# Supplementary material
Source: Frontiers journal article supplement (https://www.frontiersin.org/articles/297310)
Supplement: Image_1.PDF [file Image_1.PDF]

**Figure S1**

Major changes in the representation and presence of CC in the media over time. The press considered CC to be solely scientifically relevant until the mid-90's when it started to being perceived as a potential risk for humanity (Carvalho and Burgess 2005; Boykoff and Roberts 2007; Moser 2010; Nerlich *et al.* 2010). The steep rise of CC media coverage coincides with the ratification of the Kyoto Protocol (2005), the release of US Vice-President Al Gore's documentary "An Inconvenient Truth" (2006) as well as with more isolated events such as Al Gore/IPCC Nobel Prize (2007) (Russill 2015) and the 4<sup>th</sup> IPCC report (2007). The longevity of the media success of CC could be partly explained by its similarities with belief systems (Bhagwat *et al.* 2016) and by the norm of balanced reporting in the prestige's press which presents climate skepticism as a valid opposition to the scientific consensus (Boykoff and Boykoff 2004; Moser 2010).

|                                                                                   |                                                                        |                                                                                                              |                                                                                   |                                                                                                     |                                                                                                         |
|-----------------------------------------------------------------------------------|------------------------------------------------------------------------|--------------------------------------------------------------------------------------------------------------|-----------------------------------------------------------------------------------|-----------------------------------------------------------------------------------------------------|---------------------------------------------------------------------------------------------------------|
|  |                                                                        |                                                                                                              |  |                                                                                                     |                                                                                                         |
| <b>Before</b>                                                                     | <b>Mid'90</b>                                                          | <b>2005</b>                                                                                                  | <b>2006</b>                                                                       | <b>2007</b>                                                                                         | <b>Since then</b>                                                                                       |
| CC in the press is considered solely scientifically relevant                      | CC in the press start to be perceived as a potential risk for humanity | Ratification of the Kyoto protocol – rise in media coverage of CC issues                                     | Release of US VP Al Gore's documentary "An inconvenient truth"                    | Al Gore and the IPCC receive the peace Nobel prize / Publication of the 4 <sup>th</sup> IPCC report | Similarities of CC with belief system and norm of balance reporting maintain high media interest for CC |
|                                                                                   |                                                                        | <br><b>Kyoto Protocol</b> |                                                                                   |                |                                                                                                         |

## References

- Bhagwat SA, Economou A, and Thornton TF. 2016. The idea of climate change as a belief system: Why climate activism resembles a religious movement. *Gaia* **25**: 94–7.
- Boykoff MT and Boykoff JM. 2004. Balance as bias: Global warming and the US prestige press. *Glob Environ Chang* **14**: 125–36.
- Boykoff MT and Roberts JT. 2007. Media Coverage of Climate Change: Current Trends, Strengths, Weaknesses. *Hum Dev Rep 2007/2008*: 54.

- Carvalho A and Burgess J. 2005. Cultural circuits of climate change in U.K. broadsheet newspapers, 1985-2003. *Risk Anal* **25**: 1457–69.
- Moser SC. 2010. Communicating climate change: history, challenges, processes and future directions. *WIREs Clim Chang* **1**: 31–53.
- Nerlich B, Koteyko N, and Brown B. 2010. Theory and language of climate change communication. *WIREs Clim Chang* **1**: 97–110.
- Russill C. 2015. Climate change tipping points: origins, precursors, and debates. *Wiley Interdiscip Rev Clim Chang* **6**: 427–34.
